# Supplementary material for: Structural basis of AMPK regulation by adenine nucleotides and glycogen
Source: PubMed Central journal article supplement — Cell Res. 2014 Nov 21;25(1):50–66. doi: 10.1038/cr.2014.150 (PMC4650587; doi:10.1038/cr.2014.150), 2014-11-21
Supplement: cr2014150x2.pdf [file cr2014150x2.pdf]

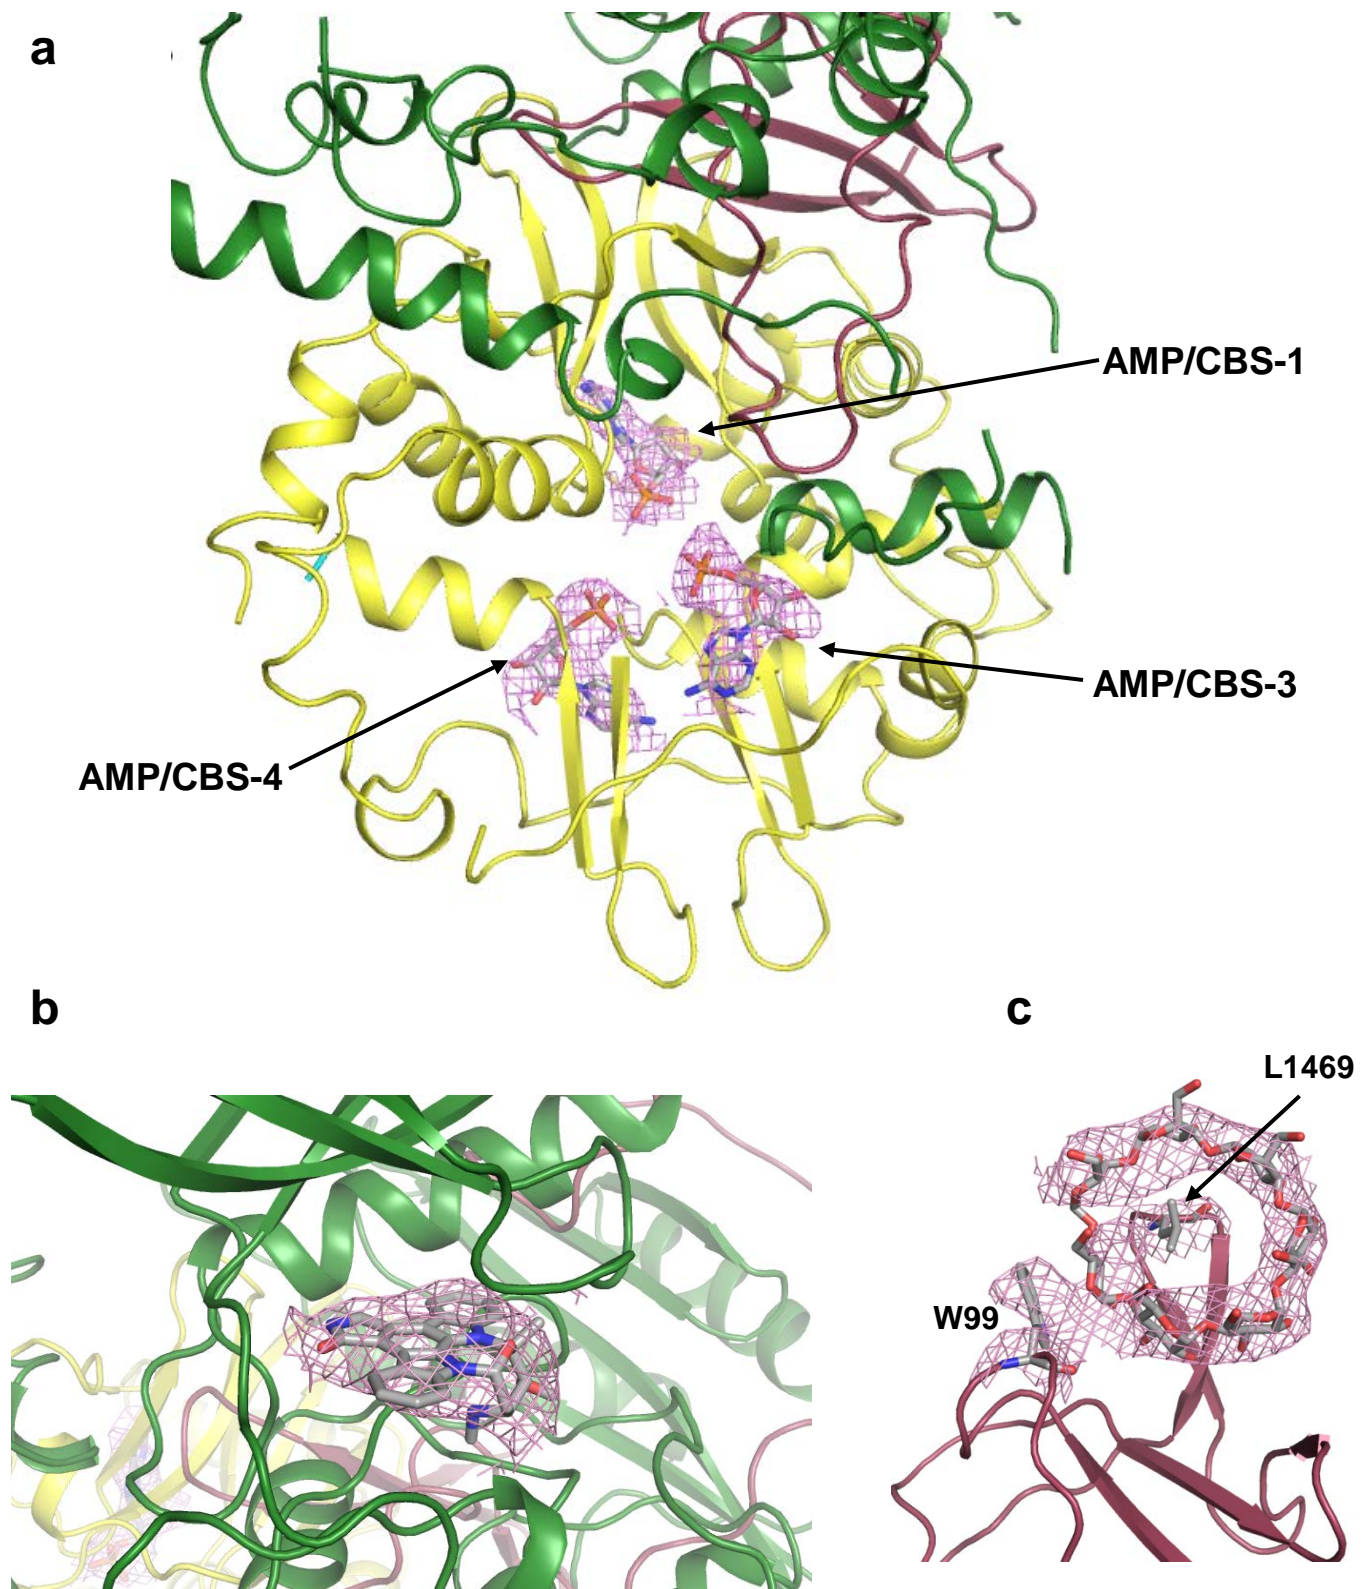

**Supplementary Figure 2. Electron density omit maps of ligands in the 4.05 Å structure of phosphorylated AMPK: (a) AMP, (b) staurosporine, (c) cyclodextrin.** Electron density maps are shown as pink meshes and have been contoured to 1.0  $\sigma$  for AMP and staurosporine and to 0.8  $\sigma$  for cyclodextrin to reflect the weaker density of the CBM relative to the rest of AMPK. Electron density of the key cyclodextrin-interacting residues W99 and L146 (c) is shown, as well.
