# Supplementary material for: Structural basis of AMPK regulation by adenine nucleotides and glycogen
Source: PubMed Central journal article supplement — Cell Res. 2014 Nov 21;25(1):50–66. doi: 10.1038/cr.2014.150 (PMC4650587; doi:10.1038/cr.2014.150), 2014-11-21
Supplement: cr2014150x4.pdf [file cr2014150x4.pdf]

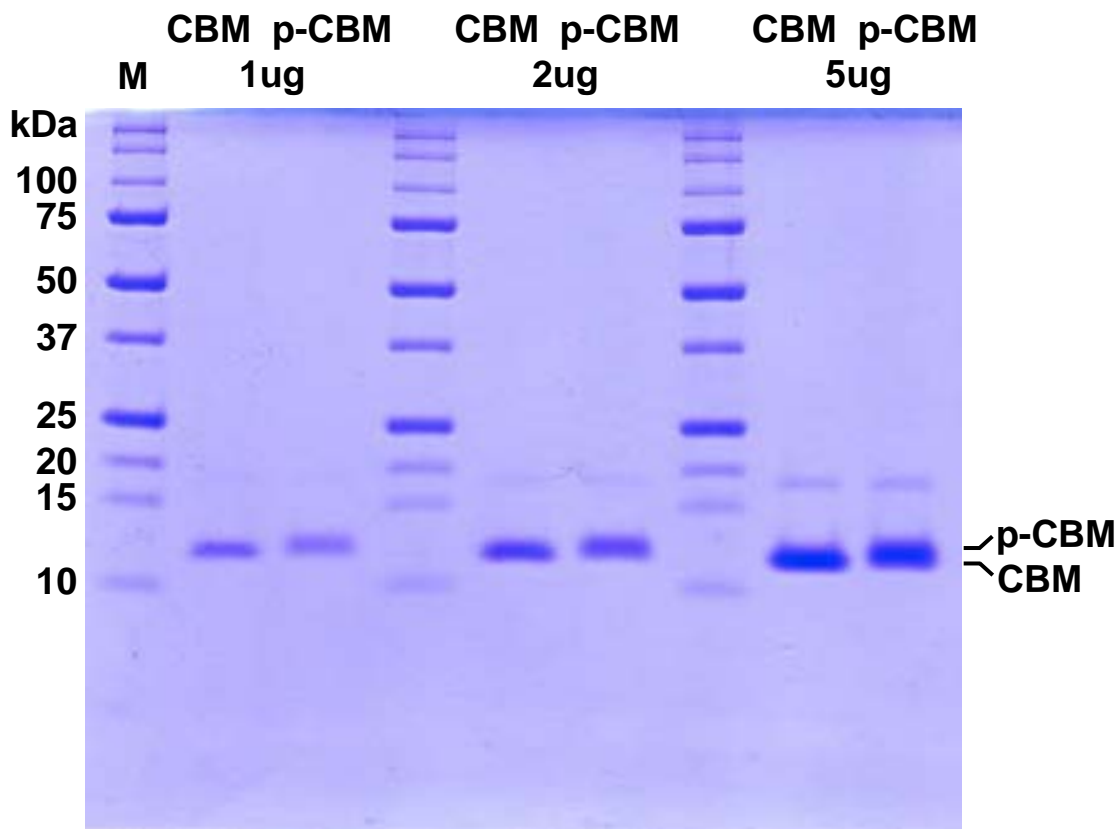

**Supplementary Figure 4. CBM phosphorylation by AMPK KD in *trans*.** Side-by-side comparison of CBM aliquots used for AlphaScreen assays (Fig. 3b). Purified CBM was split into two aliquots. Indicated amounts of the non-phosphorylated aliquot (CBM) and from the aliquot following incubation with KD in *trans* and subsequent repurification (p-CBM) were separated by SDS PAGE and stained with Coomassie Blue. Phosphorylation resulted in a distinct, quantitative mobility shift.
