# Supplementary material for: Structural basis of AMPK regulation by adenine nucleotides and glycogen
Source: PubMed Central journal article supplement — Cell Res. 2014 Nov 21;25(1):50–66. doi: 10.1038/cr.2014.150 (PMC4650587; doi:10.1038/cr.2014.150), 2014-11-21
Supplement: cr2014150x5.pdf [file cr2014150x5.pdf]

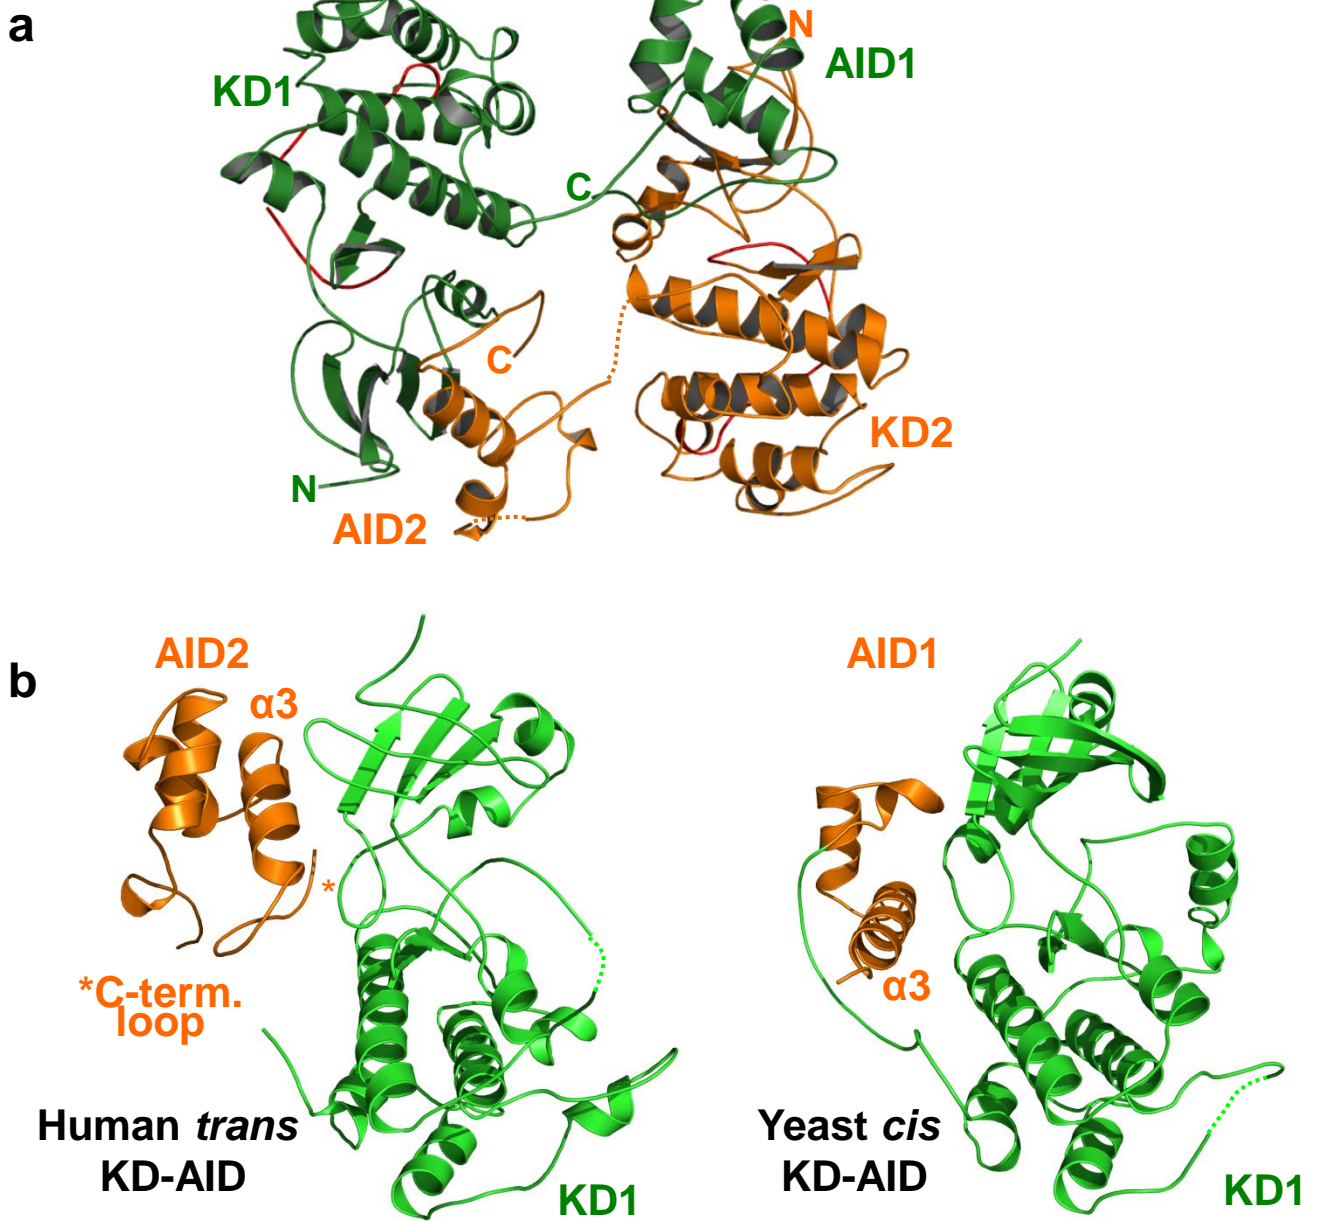

**Supplementary Figure 5. Crystal packing stabilizes a KD–AID *trans* dimer.** (a) Structure of the KD–AID *trans* dimer. One monomer (KD1–AID1) is shown in green, the other (KD2–AID2) in orange, the activation loops in red. (b) Side-by-side comparison of yeast *cis* (PDB 3H4J) and human *trans* KD–AID complexes. (c) Gelfiltration profile of the KD–AID complex at 10  $\mu$ M. The position of molecular weight standards is shown on top.
