# Supplementary material for: Structural basis of AMPK regulation by adenine nucleotides and glycogen
Source: PubMed Central journal article supplement — Cell Res. 2014 Nov 21;25(1):50–66. doi: 10.1038/cr.2014.150 (PMC4650587; doi:10.1038/cr.2014.150), 2014-11-21
Supplement: cr2014150x7.pdf [file cr2014150x7.pdf]

**a**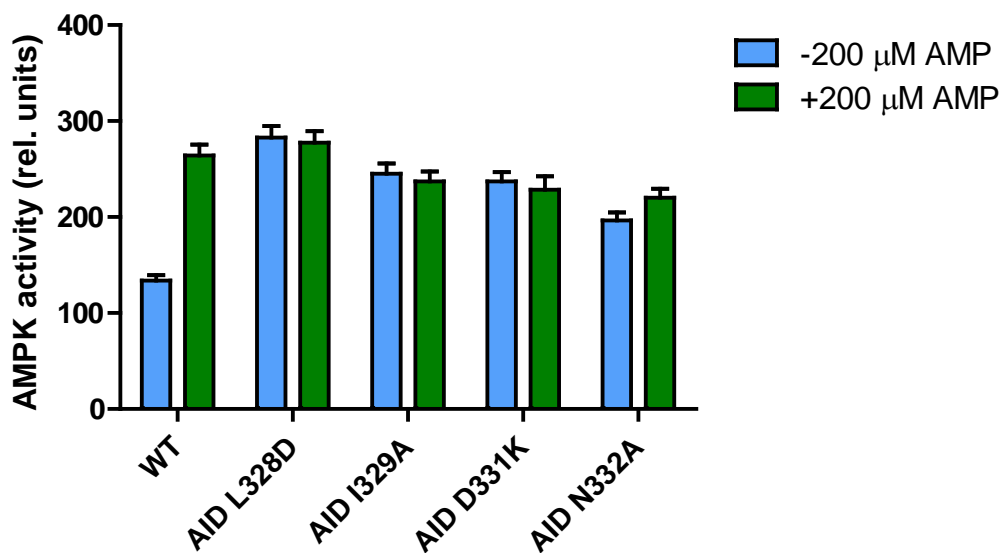**b**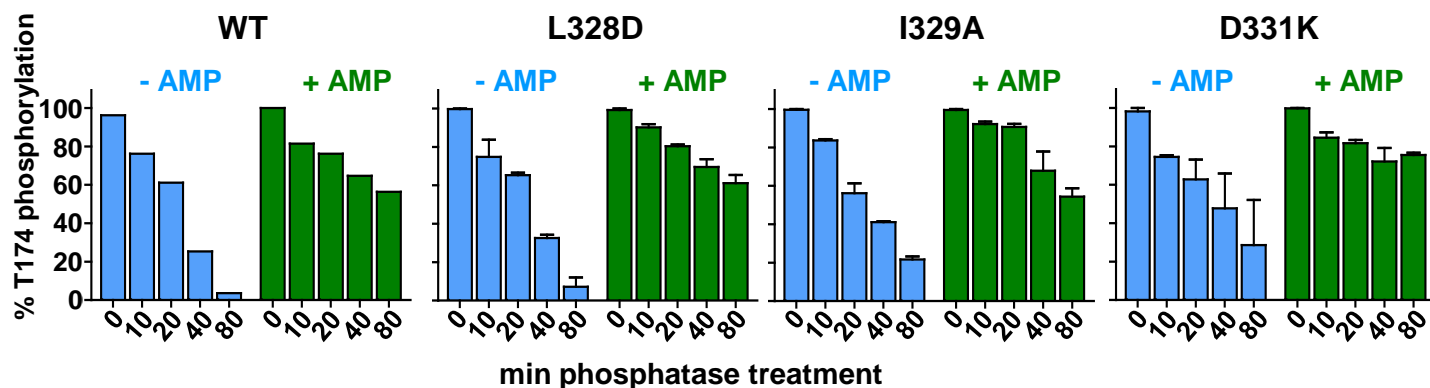

**Supplementary Figure 7. Mutations at the KD–AID interface abolish AMP-dependent allosteric kinase activation, but not protection against activation loop dephosphorylation.** Repeat sets of the representative data shown in Fig. 4f and g. **(a)** Mutations that disrupt the KD–AID interaction make AMPK constitutively active. [ $\gamma$ -32P]-ATP kinase assays with His<sub>6</sub>GST-SAMS peptide as substrate (n=3, error bars, s.d.). **(b)** Mutations that disrupt the KD–AID interaction still show AMP-dependent stabilization of activation loop phosphorylation. WT and mutant AMPK were incubated with human PP2C $\alpha$  for the indicated amount of time in the absence or presence of 0.2 mM AMP. Activation loop T174-phosphorylation was determined by immunoblotting (n=2, error bars, s.d.).
