# Supplementary material for: Structural basis of AMPK regulation by adenine nucleotides and glycogen
Source: PubMed Central journal article supplement — Cell Res. 2014 Nov 21;25(1):50–66. doi: 10.1038/cr.2014.150 (PMC4650587; doi:10.1038/cr.2014.150), 2014-11-21
Supplement: cr2014150x8.pdf [file cr2014150x8.pdf]

|                   |          |
|-------------------|----------|
| Ramachandran      |          |
| outlier           | 0.11%    |
| favored           | 95.24%   |
| Rotamer outliers  | 7.84%    |
| C-beta deviations | 0 Å      |
| Clash score       | 5.26     |
| Molprobity score  | 2.29     |
| rms bond          | 0.0068 Å |
| rms angles        | 0.99 °   |

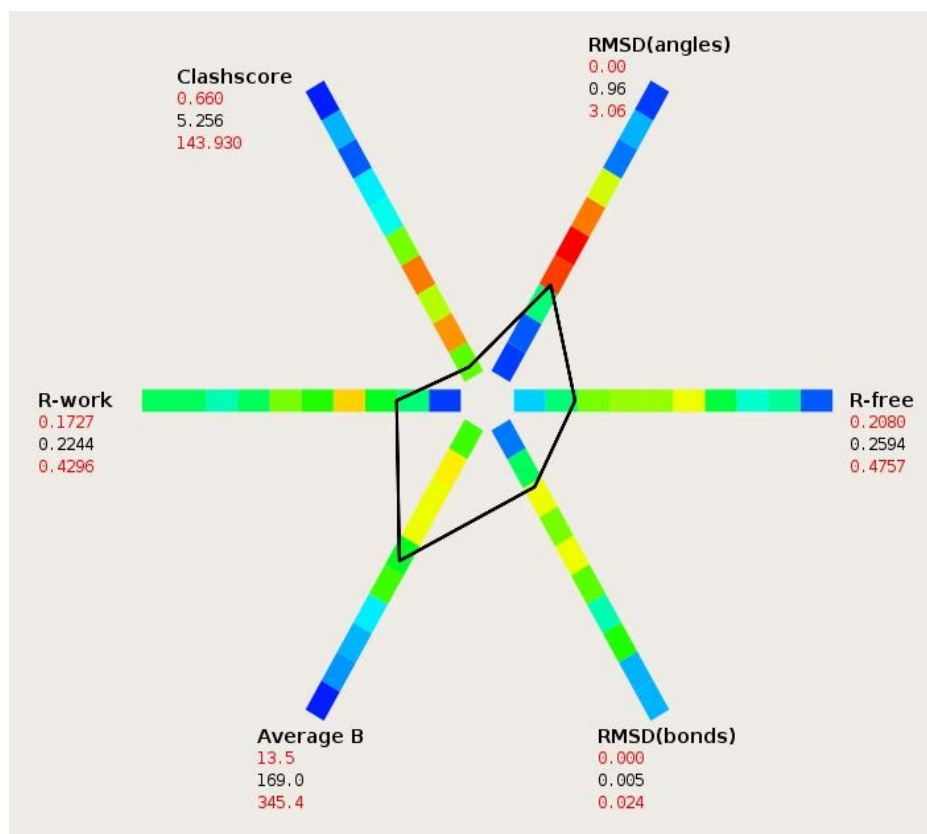

**Supplementary Figure 8. Molprobity statistics (top) and polygon diagram (bottom) of the p-AMPK model.** Polygon statistics were calculated based on 150 PDB entries of similar resolution from the PDB data bank.
