# Supplementary material for: Structural basis of AMPK regulation by adenine nucleotides and glycogen
Source: PubMed Central journal article supplement — Cell Res. 2014 Nov 21;25(1):50–66. doi: 10.1038/cr.2014.150 (PMC4650587; doi:10.1038/cr.2014.150), 2014-11-21
Supplement: cr2014150x9.pdf [file cr2014150x9.pdf]

|                   |          |
|-------------------|----------|
| Ramachandran      |          |
| outlier           | 0.13%    |
| favored           | 93.69%   |
| Rotamer outliers  | 9.17%    |
| C-beta deviations | 0        |
| Clash score       | 17.57    |
| Molprobity score  | 2.89     |
| RMS bond          | 0.0065 Å |
| RMS angles        | 0.98 °   |

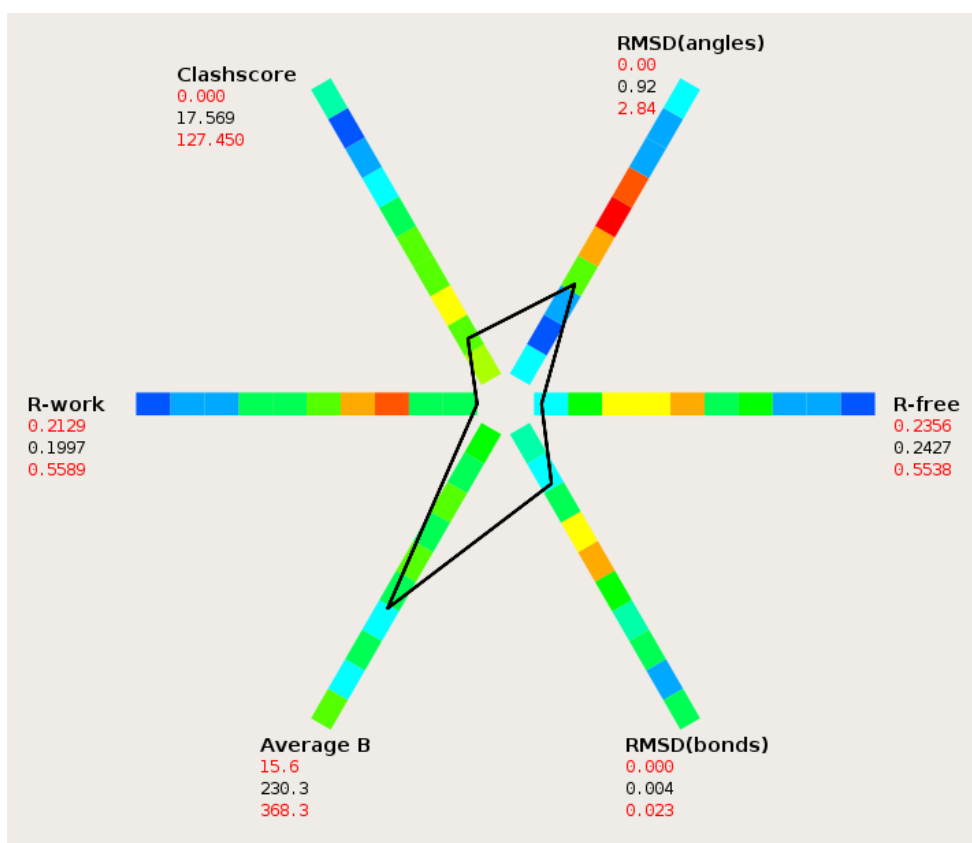

**Supplementary Figure 9. Molprobity statistics (top) and polygon diagram (bottom) of the model of non-phosphorylated AMPK** Polygon statistics were calculated based on 53 PDB entries of similar resolution from the PDB data bank.
