# Supplementary material for: Structural basis of AMPK regulation by adenine nucleotides and glycogen
Source: PubMed Central journal article supplement — Cell Res. 2014 Nov 21;25(1):50–66. doi: 10.1038/cr.2014.150 (PMC4650587; doi:10.1038/cr.2014.150), 2014-11-21
Supplement: cr2014150x10.pdf [file cr2014150x10.pdf]

|                   |          |
|-------------------|----------|
| Ramachandran      |          |
| outlier           | 0.00%    |
| favored           | 95.53%   |
| Rotamer outliers  | 5.92%    |
| C-beta deviations | 1 Å      |
| Clash score       | 10.40    |
| Molprobity score  | 2.43     |
| rms bond          | 0.0096 Å |
| rms angles        | 1.58 °   |

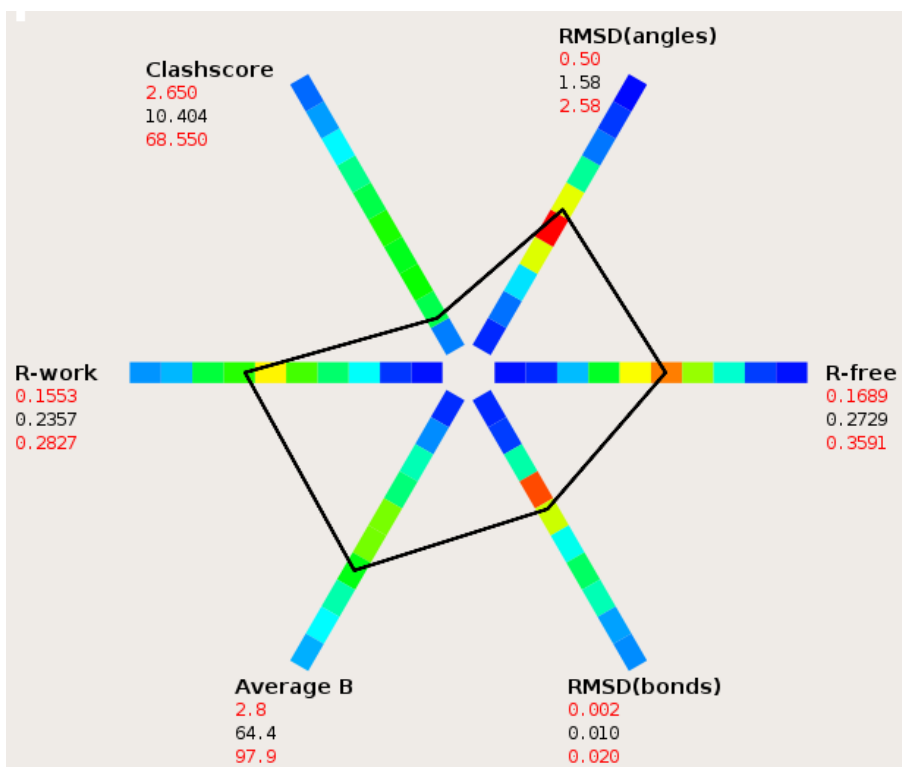

**Supplementary Figure 10. Molprobity statistics (top) and polygon diagram (bottom) of the KD-AID model.** Polygon statistics were calculated based on 780 PDB entries of similar resolution from the PDB data bank.
